# Supplementary material for: Liposomes equipped with poly(N-isopropyl acryl amide)-containing coatings as potential drug carriers
Source: Royal Society of Chemistry journal article supplement (doi:10.1039/c4ra07720b), 2014-09-04
Supplement: c4ra07720b1.pdf [file c4ra07720b1.pdf]

# Liposomes equipped with poly(N-isopropyl acryl amide)-containing coatings as potential drug carriers

Karthiga Panneerselvam,<sup>a</sup> Sofia Mena-Hernando,<sup>a</sup> Boon M. Teo,<sup>a</sup> Kenneth N. Goldie,<sup>b</sup> Brigitte Städler\*,<sup>a</sup>

<sup>a</sup> Aarhus University, Interdisciplinary Nanoscience Center (iNANO), 8000, Denmark

<sup>b</sup> Center for Cellular Imaging and Nano Analytics, B, University of Basel, Basel 4058, Switzerland

**Table S1.** Diameter and PDI of liposomes coated with PDA ( $L^D$ ), PDA/ pNiPAAm-NH<sub>2</sub> ( $L^{D/pNH_2}$ ) or PDA/pNiPAAm-HB ( $L^{D/pHB}$ ) for 30 min for  $L^D$  and 70 min for  $L^{D/pNH_2}$  and  $L^{D/pHB}$  after dialysis.

| Liposome      | Diameter(STD)<br>[nm] | PDI(STD)    |
|---------------|-----------------------|-------------|
| $L^D$         | 227(11)               | 0.29 (0.09) |
| $L^{D/pNH_2}$ | 297(37)               | 0.23(0.09)  |
| $L^{D/pHB}$   | 307(25)               | 0.18(0.03)  |

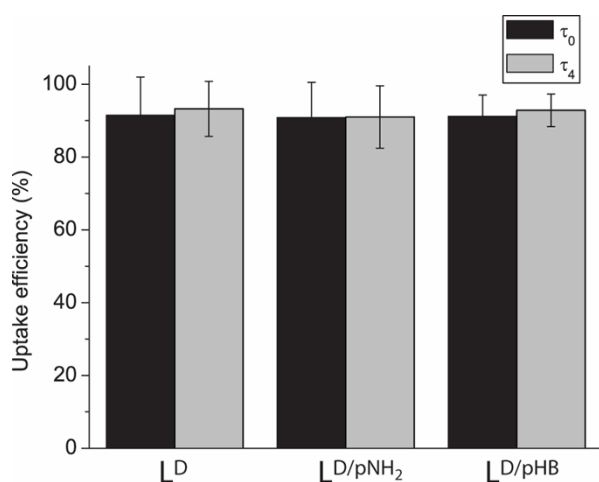

**Figure S1.** Interaction with macrophages considering shear stress: Uptake efficiency of  $L^D$ ,  $L^{D/pNH_2}$  or  $L^{D/pHB}$  by macrophages after 2.5 h at  $\tau_0$  or  $\tau_4$ .

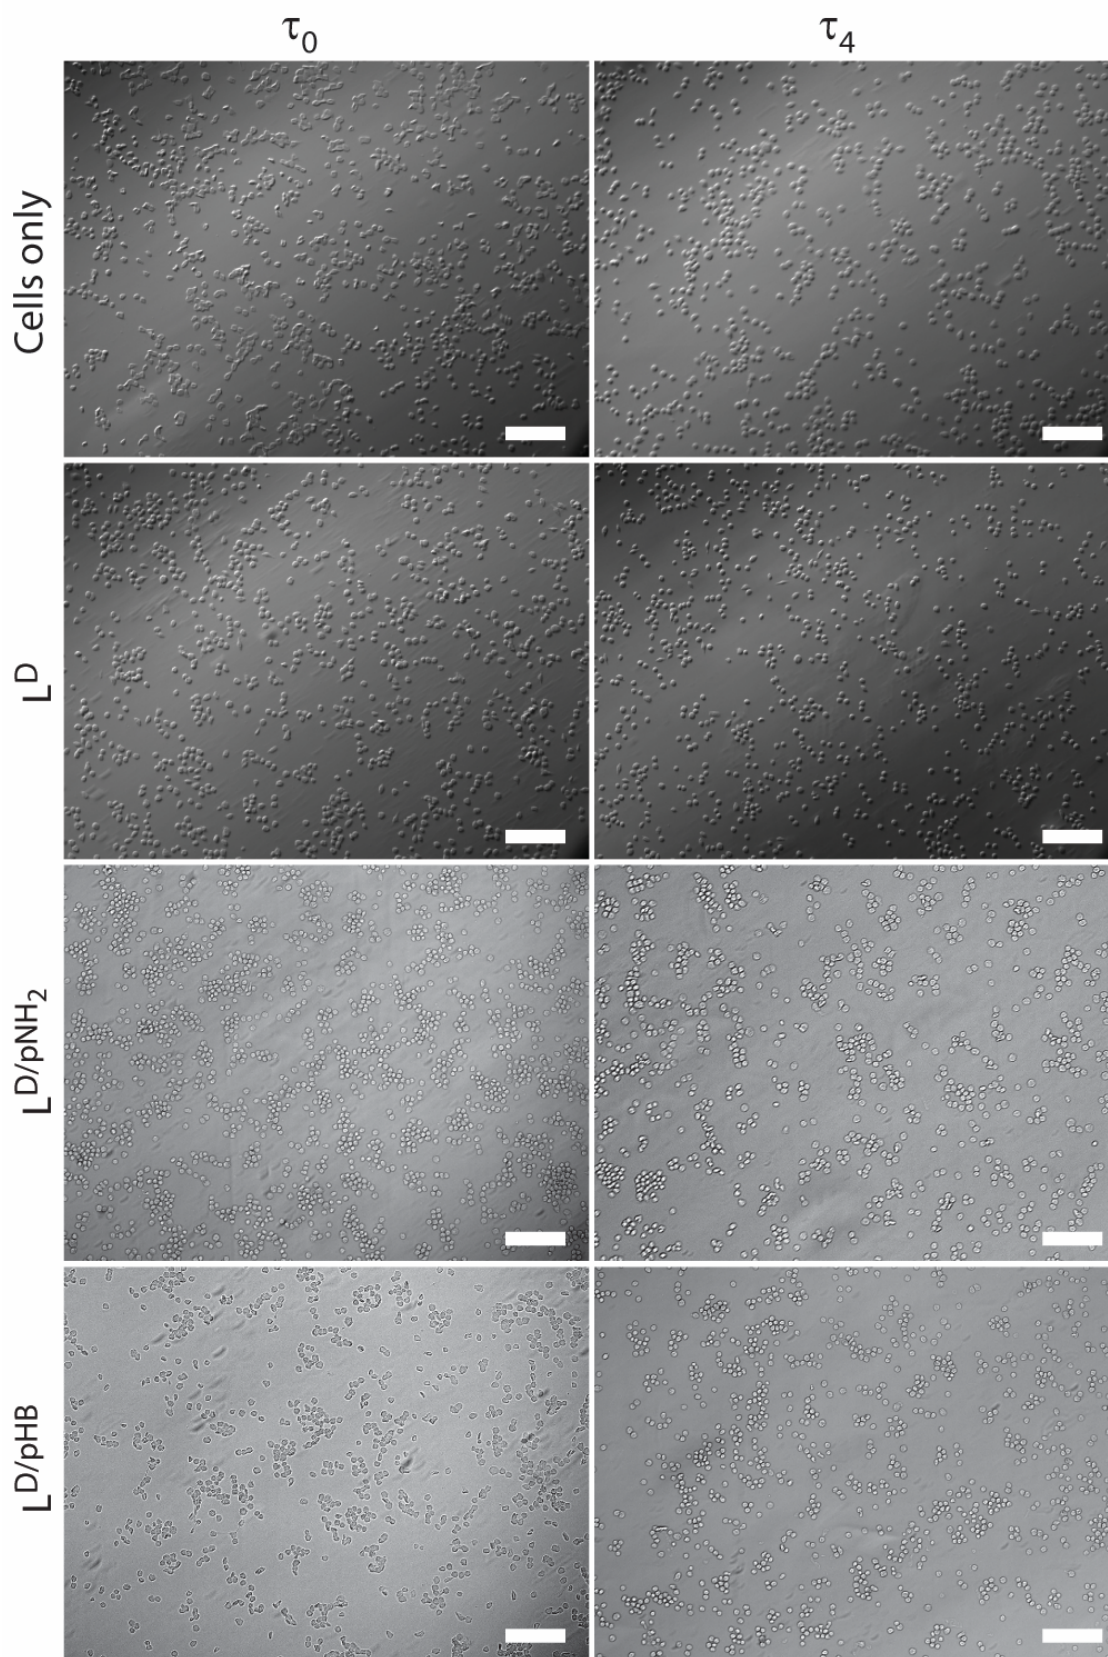

**Figure S2.** Overview bright field images of macrophages exposed to  $L^D$ ,  $L^{D/pNH_2}$  or  $L^{D/pHB}$  at  $\tau_0$  or  $\tau_4$  for 2.5 h. The scale bars are 200  $\mu m$ .

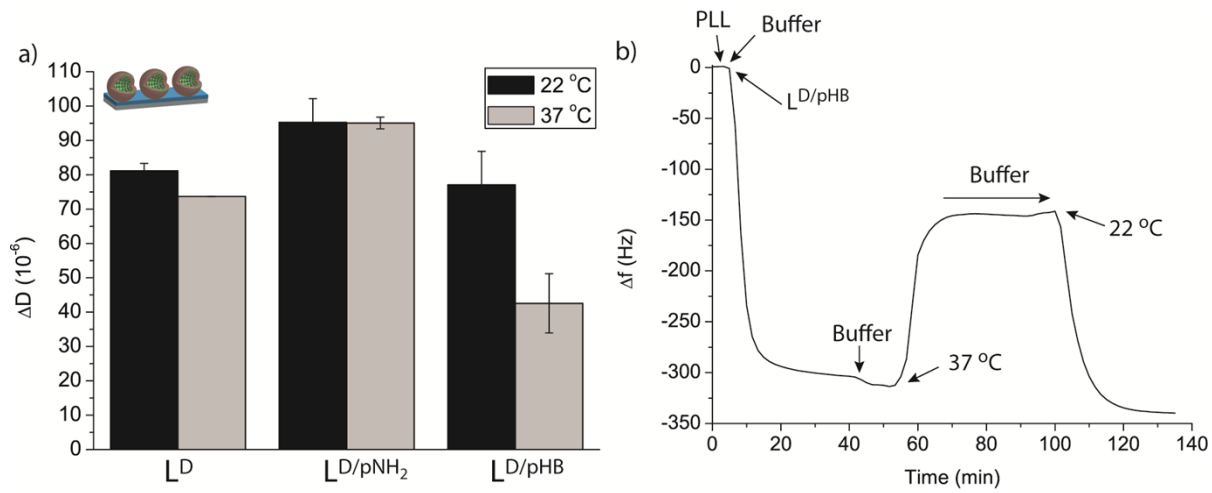

**Figure S3.** a) Adsorption of coated liposomes: Dissipation changes  $\Delta D$  of PLL coated QCM-D crystals upon exposure to  $L^D$ ,  $L^{D/pNH_2}$  or  $L^{D/pHB}$  at 22 °C and 37 °C. b) QCM-D sample curve of crystals coated with PLL,  $L^{D/pHB}$  at 22 °C followed by a temperature increase to 37 °C for 1 h constantly flowing buffer solution over the surface, and cooling down to 22 °C in the end. Since  $\Delta f$  before and after the temperature increase were found to be similar, the coated liposomes were stable adsorbed.

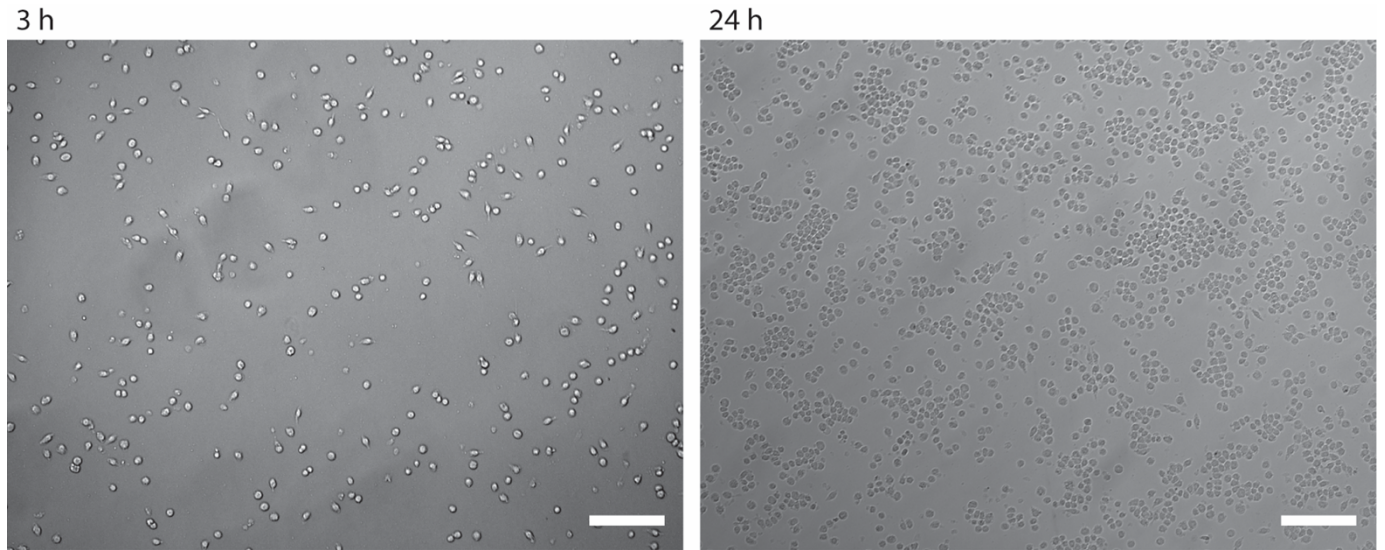

**Figure S4.** Overview bright field images of macrophages adhering to PDA coated surfaces for 3 h (top) and 24 h (bottom). The scale bars are 200  $\mu m$ .
